# Supplementary material for: A PK/PD study comparing twice-daily to once-daily dosing regimens of ertugliflozin in healthy subjects
Source: PubMed Central journal article supplement (PMC6528385; doi:10.5414/cp203343), 2019-02-25
Supplement: intjclinpharmacol-57-207-S01.pdf [file intjclinpharmacol-57-207-S01.pdf]

PK/PD of ertugliflozin QD and BID dosing  
 Supplemental Table 1. Subject disposition.

| Number of subjects                                                                                                                                                                                                                                                                                   | Cohort A                    |                          | Cohort B                    |                           | Cohort C                    |                          |
|------------------------------------------------------------------------------------------------------------------------------------------------------------------------------------------------------------------------------------------------------------------------------------------------------|-----------------------------|--------------------------|-----------------------------|---------------------------|-----------------------------|--------------------------|
|                                                                                                                                                                                                                                                                                                      | Total daily dose 5 mg       |                          | Total daily dose 15 mg      |                           | Total daily dose 5 mg       |                          |
|                                                                                                                                                                                                                                                                                                      | Ertugliflozin<br>2.5 mg BID | Ertugliflozin<br>5 mg QD | Ertugliflozin<br>7.5 mg BID | Ertugliflozin<br>15 mg QD | Ertugliflozin<br>2.5 mg BID | Ertugliflozin<br>5 mg QD |
| <b>Assigned to study medication</b>                                                                                                                                                                                                                                                                  | 70                          |                          |                             |                           |                             |                          |
| Treated                                                                                                                                                                                                                                                                                              | 20                          | 20                       | 27                          | 28                        | 22                          | 22                       |
| Completed                                                                                                                                                                                                                                                                                            | 20                          | 20                       | 27                          | 27                        | 20                          | 22                       |
| Discontinued                                                                                                                                                                                                                                                                                         | 0                           | 0                        | 0                           | 1                         | 2                           | 0                        |
| Protocol violation                                                                                                                                                                                                                                                                                   | 0                           | 0                        | 0                           | 1                         | 0                           | 0                        |
| No longer willing to participate in study                                                                                                                                                                                                                                                            | 0                           | 0                        | 0                           | 0                         | 1                           | 0                        |
| Adverse events                                                                                                                                                                                                                                                                                       | 0                           | 0                        | 0                           | 0                         | 1                           | 0                        |
| <b>Analyzed for PK</b>                                                                                                                                                                                                                                                                               |                             |                          |                             |                           |                             |                          |
| PK concentration                                                                                                                                                                                                                                                                                     | 20                          | 20                       | 27                          | 28                        | 21 <sup>a</sup>             | 22                       |
| PK parameter                                                                                                                                                                                                                                                                                         | 0                           | 0                        | 27                          | 28                        | 21 <sup>a</sup>             | 22                       |
| <b>Analyzed for PD</b>                                                                                                                                                                                                                                                                               |                             |                          |                             |                           |                             |                          |
| PD                                                                                                                                                                                                                                                                                                   | 0                           | 0                        | 27                          | 28                        | 21 <sup>a</sup>             | 22                       |
| <b>Analyzed for safety</b>                                                                                                                                                                                                                                                                           |                             |                          |                             |                           |                             |                          |
| Adverse events                                                                                                                                                                                                                                                                                       | 20                          | 20                       | 27                          | 28                        | 22                          | 22                       |
| Laboratory data                                                                                                                                                                                                                                                                                      | 20                          | 20                       | 27                          | 28                        | 22                          | 22                       |
| BID = twice daily; PD = pharmacodynamics; PK = pharmacokinetics; QD = once daily.<br>Discontinuations were attributed to the last study medication received.<br><sup>a</sup> One subject discontinued on day 2 in period 2 (ertugliflozin 2.5 mg BID), and consequently had no PK data for period 2. |                             |                          |                             |                           |                             |                          |
